# Supplementary material for: Short-Term Functional and Morphological Changes in the Primary Cultures of Trigeminal Ganglion Cells
Source: MDPI journal article supplement (doi:10.3390/cimb44030084), 2022-03-08
Supplement: s1 [file s1]

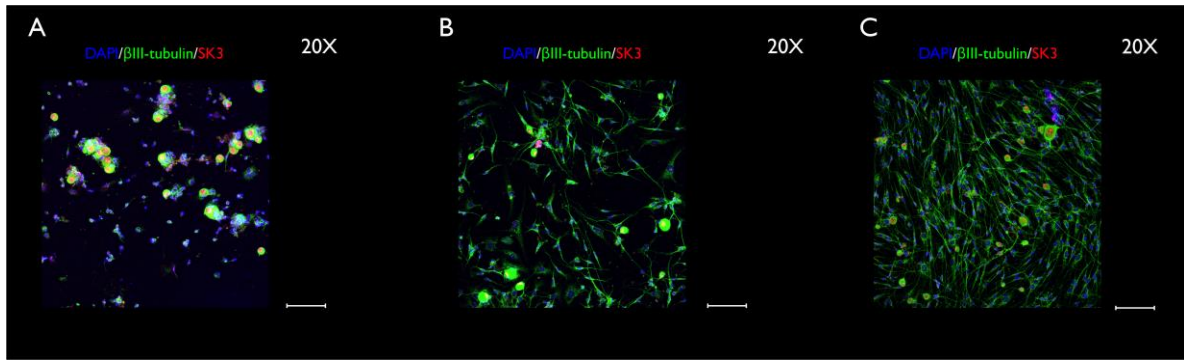

**Figure S1.** Double staining with anti-βIII-tubulin and anti-SK3 performed in cultured TGCs (20x magnification) after 4h (S1A), 24h (S1B), and 48h (S1C). Scale bars represent 100 μm.
